# Supplementary material
Source: PubMed Central journal article supplement (PMC3393554)
Supplement: supp_86.12.6889_TableS1.pdf [file supp_86.12.6889_TableS1.pdf]

**Table S1. EBV-regulated miRNAs during primary B cell outgrowth.** Exiqon v10.0 miRNA microarray data was analyzed using statistical analysis of microarrays (SAM) as described in the Methods section. Those miRNAs whose expression changed between any two groups of B, Prolif, or LCL with a false discovery rate less than or equal to 5% generated the universe of EBV-regulated miRNAs shown below. EBV-induced or EBV-repressed miRNAs were those which increased or decreased, respectively, in either B to Prolif, Prolif to LCL, or B to LCL with a p-value <0.05. Proliferation-defining miRNAs were those whose expression was significantly different (p<0.05) between the Prolif sample and the B and LCL samples combined. The asterisks refer to star strands of miRNAs. Often both guide and star strands would be detected, but occasionally only the star strand met statistical significance.

**EBV-induced cellular miRNAs (ranked by B to LCL fold-change)**

| Cellular miRNA Name | B to Prolif    |         | Prolif to LCL  |         | B to LCL       |         |
|---------------------|----------------|---------|----------------|---------|----------------|---------|
|                     | Fold Increased | p-value | Fold Increased | p-value | Fold Increased | p-value |
| hsa-miR-155*        | 48.39          | 0.000   | 1.66           | 0.298   | 80.50          | 0.007   |
| hsa-miR-597         | 63.32          | 0.001   | 0.68           | 0.732   | 43.12          | 0.048   |
| hsa-miR-542-5p      | 0.91           | 0.487   | 26.21          | 0.042   | 23.77          | 0.047   |
| hsa-miR-886-5p      | 7.73           | 0.000   | 2.09           | 0.114   | 16.18          | 0.007   |
| hsa-miR-519e        | 22.83          | 0.002   | 0.41           | 0.128   | 9.40           | 0.011   |
| hsa-miR-299-3p      | 11.48          | 0.124   | 0.76           | 0.800   | 8.68           | 0.001   |
| hsa-miR-21*         | 2.04           | 0.018   | 3.70           | 0.001   | 7.55           | 0.001   |
| hsa-miR-605         | 4.88           | 0.010   | 1.49           | 0.617   | 7.27           | 0.098   |
| hsa-miR-34a         | 2.18           | 0.032   | 3.28           | 0.007   | 7.13           | 0.004   |
| hsa-miR-193b        | 4.42           | 0.002   | 1.61           | 0.012   | 7.11           | 0.001   |
| hsa-miR-886-3p      | 3.95           | 0.000   | 1.68           | 0.205   | 6.62           | 0.018   |
| hsa-miR-181b        | 2.07           | 0.244   | 3.14           | 0.128   | 6.51           | 0.038   |
| hsa-miR-155         | 2.81           | 0.005   | 2.12           | 0.014   | 5.97           | 0.001   |
| hsa-miR-146a        | 1.55           | 0.159   | 3.79           | 0.026   | 5.85           | 0.008   |
| hsa-miR-181a*       | 1.21           | 0.386   | 4.61           | 0.163   | 5.57           | 0.141   |
| hsa-miR-146b-5p     | 1.48           | 0.266   | 3.20           | 0.025   | 4.73           | 0.011   |
| hsa-miR-18b         | 10.22          | 0.035   | 0.45           | 0.100   | 4.61           | 0.058   |
| hsa-miR-198         | 0.36           | 0.035   | 12.33          | 0.014   | 4.39           | 0.035   |
| hsa-miR-18a         | 7.79           | 0.064   | 0.56           | 0.151   | 4.37           | 0.098   |
| hsa-miR-301a        | 22.25          | 0.000   | 0.19           | 0.082   | 4.24           | 0.106   |
| hsa-miR-508-5p      | 2.72           | 0.021   | 1.47           | 0.552   | 3.99           | 0.121   |
| hsa-miR-596         | 1.48           | 0.351   | 2.67           | 0.142   | 3.96           | 0.070   |
| hsa-miR-30c-1*      | 0.75           | 0.402   | 4.91           | 0.080   | 3.70           | 0.096   |
| hsa-miR-583         | 1.09           | 0.710   | 3.37           | 0.025   | 3.67           | 0.016   |
| hsa-miR-138         | 0.79           | 0.484   | 4.58           | 0.013   | 3.60           | 0.011   |
| hsa-miR-933         | 3.40           | 0.001   | 1.06           | 0.704   | 3.58           | 0.001   |

|                |      |       |      |       |      |       |
|----------------|------|-------|------|-------|------|-------|
| hsa-miR-675    | 0.37 | 0.079 | 9.59 | 0.009 | 3.58 | 0.042 |
| hsa-miR-21     | 2.22 | 0.059 | 1.55 | 0.068 | 3.43 | 0.018 |
| hsa-miR-220b   | 7.72 | 0.001 | 0.44 | 0.061 | 3.36 | 0.020 |
| hsa-miR-302c*  | 3.14 | 0.096 | 0.98 | 0.975 | 3.09 | 0.036 |
| hsa-miR-494    | 3.30 | 0.006 | 0.93 | 0.728 | 3.07 | 0.008 |
| hsa-miR-326    | 0.80 | 0.293 | 3.71 | 0.093 | 2.96 | 0.144 |
| hsa-miR-589    | 7.10 | 0.152 | 0.41 | 0.063 | 2.93 | 0.342 |
| hsa-miR-337-3p | 6.76 | 0.002 | 0.39 | 0.015 | 2.62 | 0.017 |
| hsa-miR-193b*  | 0.95 | 0.816 | 2.75 | 0.015 | 2.62 | 0.017 |
| hsa-miR-16-2*  | 0.87 | 0.460 | 2.95 | 0.033 | 2.57 | 0.064 |
| hsa-miR-363*   | 3.11 | 0.000 | 0.82 | 0.235 | 2.56 | 0.006 |
| hsa-miR-7      | 5.91 | 0.012 | 0.35 | 0.013 | 2.06 | 0.048 |
| hsa-miR-106b*  | 6.73 | 0.008 | 0.29 | 0.008 | 1.98 | 0.034 |
| hsa-miR-17*    | 5.76 | 0.001 | 0.33 | 0.134 | 1.92 | 0.290 |
| hsa-miR-425    | 4.65 | 0.008 | 0.40 | 0.174 | 1.86 | 0.296 |
| hsa-miR-659    | 0.46 | 0.046 | 3.31 | 0.012 | 1.52 | 0.231 |

**EBV-repressed cellular miRNAs (ranked by B to LCL fold-change)**

| Cellular miRNA Name | B to Prolif    |         | Prolif to LCL  |         | B to LCL       |         |
|---------------------|----------------|---------|----------------|---------|----------------|---------|
|                     | Fold Decreased | p-value | Fold Decreased | p-value | Fold Decreased | p-value |
| hsa-miR-223         | 14.48          | 0.011   | 2.86           | 0.021   | 41.44          | 0.002   |
| hsa-miR-154         | 19.41          | 0.002   | 1.49           | 0.529   | 28.86          | 0.011   |
| hsa-miR-100         | 4.31           | 0.004   | 3.42           | 0.009   | 14.77          | 0.001   |
| hsa-let-7b          | 9.15           | 0.003   | 1.56           | 0.214   | 14.31          | 0.001   |
| hsa-miR-28-5p       | 3.95           | 0.104   | 3.35           | 0.116   | 13.26          | 0.019   |
| hsa-miR-150         | 11.18          | 0.000   | 1.18           | 0.614   | 13.18          | 0.004   |
| hsa-miR-10b         | 5.05           | 0.003   | 2.32           | 0.113   | 11.70          | 0.007   |
| hsa-miR-199a-3p     | 5.23           | 0.004   | 1.99           | 0.070   | 10.42          | 0.002   |
| hsa-miR-497         | 3.35           | 0.011   | 2.96           | 0.016   | 9.91           | 0.000   |
| hsa-miR-126*        | 5.24           | 0.004   | 1.81           | 0.074   | 9.50           | 0.001   |
| hsa-miR-99a         | 2.97           | 0.018   | 3.06           | 0.028   | 9.09           | 0.007   |
| hsa-let-7g          | 5.16           | 0.002   | 1.72           | 0.242   | 8.86           | 0.015   |
| hsa-miR-199a-5p     | 4.91           | 0.003   | 1.75           | 0.127   | 8.58           | 0.003   |
| hsa-miR-151-5p      | 3.68           | 0.128   | 2.31           | 0.202   | 8.49           | 0.040   |
| hsa-miR-145         | 4.93           | 0.009   | 1.70           | 0.141   | 8.37           | 0.003   |
| hsa-miR-199b-5p     | 4.33           | 0.003   | 1.79           | 0.192   | 7.74           | 0.009   |
| hsa-miR-10a         | 4.23           | 0.007   | 1.59           | 0.392   | 6.73           | 0.031   |
| hsa-miR-335         | 5.19           | 0.002   | 1.27           | 0.698   | 6.59           | 0.064   |
| hsa-miR-125b        | 4.96           | 0.010   | 1.30           | 0.689   | 6.44           | 0.056   |
| hsa-miR-342-3p      | 1.88           | 0.061   | 3.42           | 0.154   | 6.43           | 0.066   |
| hsa-miR-101         | 3.86           | 0.003   | 1.56           | 0.183   | 6.04           | 0.004   |

|                 |      |       |      |       |      |       |
|-----------------|------|-------|------|-------|------|-------|
| hsa-miR-26a     | 3.73 | 0.000 | 1.58 | 0.192 | 5.89 | 0.011 |
| hsa-miR-144     | 4.61 | 0.006 | 1.27 | 0.508 | 5.85 | 0.009 |
| hsa-miR-143     | 4.24 | 0.005 | 1.33 | 0.535 | 5.63 | 0.025 |
| hsa-miR-99b     | 2.69 | 0.031 | 2.03 | 0.053 | 5.45 | 0.000 |
| hsa-miR-768-5p  | 4.41 | 0.072 | 1.22 | 0.045 | 5.39 | 0.056 |
| hsa-miR-152     | 2.41 | 0.010 | 2.11 | 0.062 | 5.09 | 0.007 |
| hsa-miR-452     | 2.74 | 0.127 | 1.77 | 0.030 | 4.85 | 0.058 |
| hsa-miR-202     | 3.19 | 0.048 | 1.38 | 0.440 | 4.40 | 0.013 |
| hsa-miR-26b     | 3.06 | 0.000 | 1.43 | 0.206 | 4.36 | 0.011 |
| hsa-miR-196a*   | 2.17 | 0.007 | 1.99 | 0.007 | 4.32 | 0.001 |
| hsa-miR-145*    | 2.16 | 0.015 | 1.98 | 0.079 | 4.28 | 0.011 |
| hsa-miR-190     | 2.16 | 0.023 | 1.97 | 0.032 | 4.27 | 0.001 |
| hsa-miR-29c*    | 2.31 | 0.131 | 1.80 | 0.006 | 4.16 | 0.053 |
| hsa-miR-768-3p  | 3.07 | 0.001 | 1.35 | 0.094 | 4.14 | 0.001 |
| hsa-miR-126     | 4.78 | 0.004 | 0.85 | 0.719 | 4.08 | 0.038 |
| hsa-miR-193a-3p | 3.80 | 0.008 | 1.00 | 0.995 | 3.81 | 0.024 |
| hsa-miR-455-5p  | 2.13 | 0.143 | 1.77 | 0.137 | 3.78 | 0.039 |
| hsa-miR-140-5p  | 3.07 | 0.098 | 1.22 | 0.554 | 3.74 | 0.057 |
| hsa-miR-133b    | 1.72 | 0.079 | 2.17 | 0.027 | 3.74 | 0.007 |
| hsa-miR-133a    | 1.44 | 0.167 | 2.59 | 0.046 | 3.73 | 0.035 |
| hsa-miR-195     | 1.59 | 0.193 | 2.30 | 0.030 | 3.65 | 0.016 |
| hsa-miR-486-5p  | 2.32 | 0.060 | 1.57 | 0.207 | 3.65 | 0.018 |
| hsa-miR-140-3p  | 2.78 | 0.088 | 1.30 | 0.170 | 3.63 | 0.044 |
| hsa-miR-708     | 1.76 | 0.058 | 2.04 | 0.045 | 3.60 | 0.001 |
| hsa-miR-143*    | 1.54 | 0.158 | 2.34 | 0.064 | 3.59 | 0.037 |
| hsa-miR-144*    | 1.36 | 0.172 | 2.59 | 0.055 | 3.54 | 0.043 |
| hsa-miR-196a    | 1.73 | 0.087 | 2.04 | 0.043 | 3.53 | 0.012 |
| hsa-miR-455-3p  | 1.51 | 0.161 | 2.33 | 0.079 | 3.51 | 0.046 |
| hsa-let-7i      | 2.74 | 0.007 | 1.27 | 0.314 | 3.49 | 0.012 |
| hsa-miR-335*    | 2.81 | 0.002 | 1.23 | 0.539 | 3.47 | 0.034 |
| hsa-miR-30e*    | 3.77 | 0.041 | 0.91 | 0.829 | 3.44 | 0.025 |
| hsa-miR-29c     | 3.08 | 0.013 | 1.07 | 0.762 | 3.31 | 0.009 |
| hsa-miR-151-3p  | 1.40 | 0.014 | 2.33 | 0.014 | 3.27 | 0.005 |
| hsa-miR-15a     | 1.32 | 0.111 | 2.22 | 0.047 | 2.94 | 0.028 |
| hsa-miR-147     | 1.19 | 0.117 | 2.36 | 0.022 | 2.80 | 0.020 |
| hsa-miR-424     | 4.14 | 0.007 | 0.68 | 0.398 | 2.80 | 0.085 |
| hsa-miR-23a     | 3.18 | 0.015 | 0.81 | 0.558 | 2.58 | 0.062 |
| hsa-miR-130a    | 3.79 | 0.007 | 0.27 | 0.007 | 1.03 | 0.911 |

**Proliferation-defining miRNAs (ranked by B to Prolif fold-change)**

| Cellular miRNA Name | B to Prolif    |         | Prolif to LCL  |         | B to LCL       |         |
|---------------------|----------------|---------|----------------|---------|----------------|---------|
|                     | Fold Increased | p-value | Fold Increased | p-value | Fold Increased | p-value |
| hsa-miR-519e        | 22.83          | 0.002   | 0.41           | 0.128   | 9.40           | 0.011   |
| hsa-miR-301a        | 22.25          | 0.000   | 0.19           | 0.082   | 4.24           | 0.106   |
| hsa-miR-18b         | 10.22          | 0.035   | 0.45           | 0.100   | 4.61           | 0.058   |
| hsa-miR-18a         | 7.79           | 0.064   | 0.56           | 0.151   | 4.37           | 0.098   |
| hsa-miR-220b        | 7.72           | 0.001   | 0.44           | 0.061   | 3.36           | 0.020   |
| hsa-miR-589         | 7.10           | 0.152   | 0.41           | 0.063   | 2.93           | 0.342   |
| hsa-miR-337-3p      | 6.76           | 0.002   | 0.39           | 0.015   | 2.62           | 0.017   |
| hsa-miR-106b*       | 6.73           | 0.008   | 0.29           | 0.008   | 1.98           | 0.034   |
| hsa-miR-7           | 5.91           | 0.012   | 0.35           | 0.013   | 2.06           | 0.048   |
| hsa-miR-17*         | 5.76           | 0.001   | 0.33           | 0.134   | 1.92           | 0.290   |
| hsa-miR-425         | 4.65           | 0.008   | 0.40           | 0.174   | 1.86           | 0.296   |
| hsa-miR-363*        | 3.11           | 0.000   | 0.82           | 0.235   | 2.56           | 0.006   |
| hsa-miR-659         | 0.46           | 0.046   | 3.31           | 0.012   | 1.52           | 0.231   |
| hsa-miR-675         | 0.37           | 0.079   | 9.59           | 0.009   | 3.58           | 0.042   |
| hsa-miR-198         | 0.36           | 0.035   | 12.33          | 0.014   | 4.39           | 0.035   |
| hsa-miR-130a        | 0.26           | 0.007   | 3.68           | 0.007   | 0.97           | 0.911   |
| hsa-miR-424         | 0.24           | 0.007   | 1.48           | 0.398   | 0.36           | 0.085   |
